# Supplementary material for: Assessing the Impact of a Risk-Based Intervention on Piped Water Quality in Rural Communities: The Case of Mid-Western Nepal
Source: PubMed Central journal article supplement (PMC6121632; doi:10.3390/ijerph15081616), 2018-07-31
Supplement: ijerph-15-01616-s001.pdf [file ijerph-15-01616-s001.pdf]

# Assessing the Impact of a Risk-Based Intervention on Piped Water Quality in Rural Communities: The Case of Mid-Western Nepal

Dorian Tosi Robinson, Ariane Schertenleib, Bal Mukunda Kunwar, Rubika Shrestha, Madan Bhatta and Sara J. Marks

## Supplementary Materials

### *Section S1. The Regular Monitoring Strategy*

Regular monitoring was performed at each intervention scheme at one source, one reservoir tank, one tap, and one household. All the points were water-connected: the household used water from the corresponding tap, which was connected to the tank and the source that were monitored. The responsibility to select monitoring locations each month was left to the local communities with the help of the local NGO staffs. Each month, the source, tank, tap, and households were rotated. The selection of the households had the condition that the visit should not be planned, and the household not be aware in advance of the upcoming visit. The sources and the tanks were monitored more often than the taps and the households because of their lower number.

### *Section S2. Water Scheme Upgrades*

To improve the safety of the water schemes the following infrastructure upgrades took place: intake improvement with sand and gravel filters, runoff water diversion at the intake, protection work against hazards (landslides, gully, open grazing), minor repairs of the water pipes and structures, and 3R (Recharge, Retention, Reuse) interventions. 3R interventions were expected to show long-term outcomes and were thus only partly operative at the time of writing this paper. For example, plantation work was ongoing at the study endline, and native plants still needed to establish themselves in order to deliver the expected benefits to the local micro-catchment. Additionally, to treat the water and prevent contamination during distribution and handling, two schemes agreed to adopt system-level chlorination practices. Technicians were trained to add a bleach powder solution to the reservoir tank prior to distribution.

### *Section S3. Membrane Filtration Protocol*

To determine the microbial water contamination, the membrane filtration method with the DelAgua kit (DelAgua Group, Lower Fyfield, UK) was used. The protocol has been adapted to the field conditions as follows: (1) The filtration funnel and cup are first dried with clean tissue of all wet residues from the previous processing. (2) It is then disinfected by burning a few drops of methanol inside the metal cup and covering it when almost burnt with the funnel in a loose position to disinfect all surfaces. (3) The system is then air tight and left in this position for 15 minutes to ensure disinfection by the formaldehyde produced through the incomplete combustion of methanol. (4) Hands are at this point disinfected with an ethanol-based disinfectant. (5) A sterile 0.45 µm gridded membrane filter (Merck Millipore, Darmstadt, Germany) is then used for the filtration. It is handled with tweezers that were previously flamed with a lighter and carefully placed on the funnel with the grid facing upwards. (6) All precautions for the sterile technique are taken to ensure that sterilized surfaces are not contaminated. The table surface is disinfected between samples, and the manipulations are done without laying items on the working space unless they are sterilized again. (7) The water sample is poured in the filter funnel up to the 100 mL line. (8) The hand pump is used to create a vacuum and filter the sample. (9) The hands are again sterilized, and a compact dry plate with chromogenic nutrient medium for the detection of coliforms and *E. coli* (Nissui Pharmaceuticals, Tokyo, Japan) is opened and wet with a few drops of sterile water from a baby bottle. This sterile water was previously prepared by boiling a baby bottle in water for more than 5 min and using the

boiling water to fill it. The sterile water is then left to cool to room temperature before use. (10) The membrane filter is then transferred to the compact dry plate with the grid facing upwards using tweezers that were flamed again before use. (11) The compact dry plate is then incubated face down at  $35 \pm 2$  °C for 24 hours in the field incubator.

#### Section S4. Construction of Field Incubators

A low-cost solar-powered field incubator was developed at Eawag for use in remote field conditions. The main components of the incubator are as follows: an isolation box made of polystyrene walls, an on/off temperature regulator TSM 125 (H-Tronic GmbH, Hirschau, Germany) connected to a temperature probe, a small fan, and heating strips. The incubator maintained a consistent temperature of  $35 \pm 2$  °C throughout the study.

A solar photovoltaic array, a charge controller box and a battery were used to power the incubator. The materials for this setup are readily available in Nepal, as they are commonly used to power house lighting and small appliances in rural areas.

#### Section S5. Water Quality Tests Validity Measurements

**Duplicates:** Table S1 summarizes the analysis of duplicates. Overall, most of the duplicates were close to the sample concentration. The mean difference based on the *E. coli* concentration is of 13 CFU/100 mL at the baseline and endline data collection. During regular monitoring, a difference of 5.2 CFU/100 mL was observed. At the baseline and the endline, the maximum difference in *E. coli* between the sample and its duplicate was 293 CFU/100 mL. Similarly, for total coliforms, only two differences were higher than 100 CFU/100 mL (300 and 143 CFU/100 mL, respectively). For regular monitoring and total coliforms, three differences were above 100 CFU/100 mL. The result for *E. coli* was better with a maximum of 28 CFU/100 mL difference between two duplicates.

**Table S1.** Duplicates statistics: differences between the samples and their duplicates. Units: [CFU/100 mL].

| Statistic           | Baseline and endline               |                                     | Regular monitoring                 |                                     |
|---------------------|------------------------------------|-------------------------------------|------------------------------------|-------------------------------------|
|                     | <i>E. coli</i><br>( <i>n</i> = 50) | Total coliforms<br>( <i>n</i> = 48) | <i>E. coli</i><br>( <i>n</i> = 21) | Total coliforms<br>( <i>n</i> = 21) |
| Mean absolute delta | 13                                 | 16.2                                | 5.2                                | 25.5                                |
| CI (95%)            | 6.1                                | 6.8                                 | 1.5                                | 9.1                                 |
| SD                  | 43.4                               | 48.4                                | 7                                  | 41.9                                |
| Median (25%; 75%)   | 2 (0; 6.75)                        | 0 (0; 8.75)                         | 4 (0; 9)                           | 4 (0; 36)                           |
| Min delta           | 0                                  | 0                                   | 0                                  | 0                                   |
| Max delta           | 293                                | 300                                 | 28                                 | 127                                 |

**Negative controls:** Table S2 shows the results of all the negative controls that were carried. Only one negative control tested positive for coliform contamination (2 CFU/100 mL). As all other negative controls were free from contamination, it can be concluded that the quality of the laboratory work in the field conditions was not compromised and that the results are reliable.

**Table S2.** Results for the negative controls for baseline, regular monitoring and endline.

| Sample phase                        | Negative control free from contamination [%] | Negative control contaminated [%] |
|-------------------------------------|----------------------------------------------|-----------------------------------|
| Baseline ( <i>n</i> = 7)            | 100                                          | 0                                 |
| Regular monitoring ( <i>n</i> = 23) | 95.5                                         | 4.5                               |
| Endline ( <i>n</i> = 28)            | 100                                          | 0                                 |

**Processing time:** During the baseline data collection, a subset of samples was processed in more than the two h, as recommended in the protocol. From a total of 120 samples collected from households, 15 were processed in more than 2 h, and 32 were processed in more than 3 h. The maximum time between sampling and processing was 7 h. To verify whether this extended hold time influenced the

results, a Chi square analysis was run (Table S3). There was no statistically significant relationship between the microbial concentration and hold time, indicating that holding times of greater than 3 h did not meaningfully influence results.

**Table S3.** Chi-Square test of independence for processing time.

| Time between sampling and processing | <i>E. coli</i> 0 CFU/100 mL vs <i>E. coli</i> >0 CFU/100 mL | <i>E. coli</i> 0-10 CFU/100 mL vs <i>E. coli</i> >10 CFU/100 mL |
|--------------------------------------|-------------------------------------------------------------|-----------------------------------------------------------------|
| Exceeded 2 hours                     | $X^2 (1) = 0.846, p = 0.358$                                | $X^2 (1) = 0.266, p = 0.0.606$                                  |
| Exceeded 3 hours                     | $X^2 (1) = 0.545, p = 0.46$                                 | $X^2 (1) = 0.0.003, p = 0.956$                                  |

### Section S6. Detailed Survey Results

**Table S4.** Household characteristics. All values in percentage [%] if not stated otherwise.

| Characteristic                                                      | Option                             | Baseline<br>( <i>n</i> = 120) | Endline<br>( <i>n</i> = 115) |
|---------------------------------------------------------------------|------------------------------------|-------------------------------|------------------------------|
| Respondent                                                          | Male head                          | 42.5                          | 27.5                         |
|                                                                     | Female head                        | 37.5                          | 43.3                         |
|                                                                     | Other male                         | 3.3                           | 6.7                          |
|                                                                     | Other female                       | 16.7                          | 18.3                         |
| Age of interviewee (years)                                          | -                                  | 18–78<br>(M = 41, SD = 14)    | 18–82<br>(M = 40, SD = 15)   |
| Household population (number)                                       | -                                  | 2–16<br>(M = 6.7, SD = 2.6)   | 1–15<br>(M = 6.5, SD = 2.3)  |
| Children age 6–18 per household (number)                            | -                                  | M = 2.1, SD = 1.4             | M = 2, SD = 1.3              |
| Children age <5 per household (number)                              | -                                  | M = 1, SD = 1                 | M = 0.8, SD = 0.9            |
| Highest level of education of interviewee                           | Illiterate                         | 36                            | 21                           |
|                                                                     | Literate                           | 26.5                          | 38                           |
|                                                                     | Primary                            | 9                             | 18                           |
|                                                                     | Secondary                          | 16                            | 14                           |
|                                                                     | University/college                 | 11.5                          | 9                            |
|                                                                     | Post-graduate                      | 1                             | 0                            |
| Occupations of the household*                                       | Farming/agriculture                | 99                            | 99                           |
|                                                                     | Job/service                        | 50                            | 20                           |
|                                                                     | Business                           | 26                            | 16                           |
|                                                                     | Abroad/foreign employment          | 0                             | 1                            |
|                                                                     | Daily labor in their own community | 11                            | 6                            |
|                                                                     | Seasonal employment in India       | 46                            | 50                           |
|                                                                     | Seasonal employment in Nepal       | 4                             | 1                            |
|                                                                     | Other                              | 3                             | 0                            |
| Involvement of any member of the household to a leadership position | No                                 | 97                            | 88                           |
|                                                                     | Chair person                       | 0                             | 3                            |
|                                                                     | Mayor                              | 1                             | 0                            |
|                                                                     | Deputy mayor                       | 0                             | 0                            |
|                                                                     | Member of local body               | 0                             | 0                            |
|                                                                     | Other                              | 1                             | 0                            |
| Ethnicity of the household                                          | Dalit                              | 20                            | 20                           |
|                                                                     | Janjati                            | 0                             | 0                            |
|                                                                     | Other                              | 80                            | 80                           |
| Main concern of the household                                       | Health and healthcare services     | 5                             | 12                           |
|                                                                     | Sanitation                         | 1                             | 6                            |
|                                                                     | Water supply services              | 39                            | 13                           |
|                                                                     | Transportation and roads           | 4                             | 11                           |
|                                                                     | Agriculture                        | 5                             | 20                           |

|                                  |                    |                                    |                                    |
|----------------------------------|--------------------|------------------------------------|------------------------------------|
|                                  | Electricity        | 20                                 | 24                                 |
|                                  | Jobs               | 23                                 | 3                                  |
|                                  | Education          | 3                                  | 8                                  |
|                                  | Security and crime | 0                                  | 1                                  |
|                                  | Other              | 0                                  | 0                                  |
|                                  | Do not know        | 0                                  | 0                                  |
| Household monthly expenses (NPR) | -                  | 2000–42,000(M = 10,370, SD = 7920) | 1550–50,000(M = 10,610, SD = 7800) |

\* Multiple answers possible.

**Table S5.** Household observations. All values in percentage [%].

| Survey Question                                 | Options                            | Intervention         |                     | Control              |                     |
|-------------------------------------------------|------------------------------------|----------------------|---------------------|----------------------|---------------------|
|                                                 |                                    | Baseline<br>(n = 75) | Endline<br>(n = 72) | Baseline<br>(n = 45) | Endline<br>(n = 43) |
| What are the walls made of?                     | Stone/Brick/Cement/concrete blocks | 26.7                 | 1.4                 | 15.6                 | 0                   |
|                                                 | Wood/mud                           | 73.3                 | 95.8                | 84.4                 | 97.7                |
|                                                 | Metal                              | 0                    | 2.8                 | 0                    | 2.3                 |
|                                                 | Sticks                             | 0                    | 0                   | 0                    | 0                   |
|                                                 | Straw                              | 0                    | 0                   | 0                    | 0                   |
|                                                 | Other                              | 0                    | 0                   | 0                    | 0                   |
| What is the roof made of?                       | Metal/sheet metal                  | 58.7                 | 75                  | 35.6                 | 44.2                |
|                                                 | Thatch/branches                    | 28                   | 13.9                | 48.9                 | 14                  |
|                                                 | Cement/concrete                    | 0                    | 0                   | 0                    | 0                   |
|                                                 | Wood                               | 0                    | 0                   | 0                    | 0                   |
|                                                 | Tiles                              | 6.7                  | 6.9                 | 2.2                  | 4.7                 |
|                                                 | Mud                                | 2.7                  | 1.4                 | 13.3                 | 14                  |
|                                                 | Plastic                            | 0                    | 0                   | 0                    | 0                   |
| What is the floor made of?                      | Other                              | 4                    | 2.8                 | 0                    | 23.3                |
|                                                 | Cement/concrete                    | 5.3                  | 1.4                 | 2.2                  | 2.3                 |
|                                                 | Tile                               | 0                    | 0                   | 0                    | 0                   |
|                                                 | Wood                               | 4                    | 2.8                 | 0                    | 0                   |
|                                                 | Mud/sand/dirt                      | 86.7                 | 95.8                | 93.3                 | 97.7                |
| What type of toilet is present?                 | Other                              | 4                    | 0                   | 4.4                  | 0                   |
|                                                 | Flush toilet in home               | 1.3                  | 0                   | 2.2                  | 2.3                 |
|                                                 | Improved latrine private           | 92                   | 97.2                | 88.9                 | 93                  |
|                                                 | Improved latrine shared            | 0                    | 1.4                 | 2.2                  | 4.7                 |
|                                                 | Improved latrine public            | 0                    | 0                   | 2.2                  | 0                   |
|                                                 | Unimproved latrine private         | 6.7                  | 0                   | 4.4                  | 0                   |
|                                                 | Unimproved latrine shared          | 0                    | 0                   | 0                    | 0                   |
|                                                 | Unimproved latrine public          | 0                    | 1.4                 | 0                    | 0                   |
|                                                 | No facility                        | 0                    | 0                   | 0                    | 0                   |
| Other                                           | 0                                  | 0                    | 0                   | 0                    |                     |
| Does the household have electricity connection? | Yes, working                       | 86.7                 | 94.4                | 88.9                 | 90.7                |
|                                                 | Yes, not working                   | 4                    | 2.8                 | 0                    | 2.3                 |
|                                                 | No                                 | 9.3                  | 2.8                 | 11.1                 | 7                   |

**Table S6.** Household handwashing practices. All values in percentage [%].

| Survey Question                         | Options               | Intervention         |                     | Control              |                     |
|-----------------------------------------|-----------------------|----------------------|---------------------|----------------------|---------------------|
|                                         |                       | Baseline<br>(n = 75) | Endline<br>(n = 72) | Baseline<br>(n = 45) | Endline<br>(n = 43) |
| When did the interviewee wash his hands | After going to toilet | 99                   | 99                  | 91                   | 100                 |
|                                         | Before eating         | 93                   | 99                  | 98                   | 95                  |
|                                         | Before cooking        | 68                   | 82                  | 67                   | 63                  |

|                                                                   |                                 |      |      |      |      |
|-------------------------------------------------------------------|---------------------------------|------|------|------|------|
| the previous day? *                                               | After cleaning baby's bottom    | 45   | 31   | 62   | 21   |
|                                                                   | After field work                | 60   | 92   | 73   | 86   |
|                                                                   | No critical times mentioned     | 20   | 0    | 29   | 12   |
| Frequency of soap use during the previous day handwashing events? | Always                          | 43   | 62.5 | 80   | 60.5 |
|                                                                   | Sometimes                       | 56   | 37.5 | 20   | 39.5 |
|                                                                   | Never                           | 1    | 0    | 0    | 0    |
| Type of handwashing facility?                                     | Handwashing station with faucet | 65.5 | 83.5 | 84.5 | 81.5 |
|                                                                   | Bowls/jugs                      | 20   | 8.5  | 4.5  | 11.5 |
|                                                                   | Tap                             | 8    | 3    | 4.5  | 4.5  |
|                                                                   | Other                           | 0    | 3    | 4.5  | 2.5  |
|                                                                   | No facility                     | 6.5  | 3    | 2    | 0    |

\* Multiple answers possible.

**Table S7.** Drinking water quality perception. All values in percentage [%].

| Subject                             | Options                          | Intervention         |                     | Control              |                     |
|-------------------------------------|----------------------------------|----------------------|---------------------|----------------------|---------------------|
|                                     |                                  | Baseline<br>(n = 75) | Endline<br>(n = 72) | Baseline<br>(n = 45) | Endline<br>(n = 43) |
| Water taste perception *            | Good                             | 98.5                 | 93.0                | 98.0                 | 83.5                |
|                                     | Salty                            | 1.5                  | 0                   | 0                    | 2.5                 |
|                                     | Chlorine                         | 0                    | 5.5 <sup>1</sup>    | 0                    | 2.5                 |
|                                     | Rusty/metallic                   | 0                    | 0                   | 0                    | 2.5                 |
|                                     | Soil/dirt                        | 0                    | 0                   | 0                    | 0                   |
|                                     | Varies from rainy to dry months  | 2.5                  | 0                   | 4.5                  | 2.5                 |
|                                     | Other                            | 0                    | 0                   | 0                    | 0                   |
|                                     | Do not know                      | 0                    | 1.5                 | 0                    | 9.5                 |
| Water smell perception *            | No smell                         | 100.0                | 93.1                | 100.0                | 88.4                |
|                                     | Smells bad/funny                 | 0                    | 5.6 <sup>1</sup>    | 0                    | 7.0                 |
|                                     | Do not know                      | 0                    | 1.5                 | 0                    | 4.7                 |
| Water color perception *            | Good/clear                       | 92.0                 | 93.0                | 95.5                 | 79.0                |
|                                     | Cloudy                           | 1.5                  | 5.5                 | 0                    | 4.5                 |
|                                     | Brown                            | 0                    | 0                   | 0                    | 2.5                 |
|                                     | Varies from rainy to dry months  | 8.0                  | 1.5                 | 20.0                 | 0                   |
|                                     | Other                            | 1.5                  | 0                   | 0                    | 0                   |
|                                     | Do not know                      | 2.5                  | 0                   | 0                    | 14.0                |
| Safety perception                   | Generally safe                   | 89.5                 | 98.5                | 84.5                 | 79                  |
|                                     | Somewhat unsafe                  | 6.5                  | 1.5                 | 11.0                 | 14.0                |
|                                     | Very unsafe                      | 0                    | 0                   | 0                    | 2.5                 |
|                                     | Varies from rainy to dry months  | 2.5                  | 0                   | 4.5                  | 0                   |
|                                     | Do not know                      | 1.5                  | 0                   | 0                    | 4.5                 |
| Do you treat your water in any way? | Yes                              | 69.5                 | 100.0               | 86.5                 | 90.5                |
|                                     | No                               | 30.5                 | 0                   | 13.5                 | 9.5                 |
| If you treat the water, how? *      | Chlorine                         | 0                    | 12.5                | 0                    | 2.5                 |
|                                     | Screening/filtering with a cloth | 0                    | 0                   | 2.5                  | 2.5                 |
|                                     | Ceramic candle filter            | 88.5                 | 97.0                | 97.5                 | 95.0                |
|                                     | Silver coated filter             | 0                    | 1.5                 | 0                    | 2.5                 |
|                                     | Coagulation/settlement           | 0                    | 0                   | 0                    | 0                   |
|                                     | UV/SODIS                         | 0                    | 0                   | 0                    | 0                   |
|                                     | Boiling                          | 17.0                 | 7.0                 | 7.5                  | 15.5                |
|                                     | Other                            | 0                    | 0                   | 0                    | 0                   |
|                                     | Do not know                      | 0                    | 0                   | 0                    | 0                   |
| How often do you treat it?          | Always                           | 77.5                 | 91.5                | 89.5                 | 84.5                |
|                                     | Almost always                    | 11.5                 | 8.5                 | 0                    | 13.0                |
|                                     | Sometimes                        | 4.0                  | 0                   | 2.5                  | 2.5                 |
|                                     | Rarely                           | 7.5                  | 0                   | 5.0                  | 0                   |
|                                     | Do not know                      | 0                    | 0                   | 2.5                  | 0                   |

\* Multiple answers possible; <sup>1</sup> Considering only chlorinated schemes, chlorine taste is reported by 15% of the 29 households concerned. Smell perception as bad/funny is 14% for chlorinated schemes.

**Table S8.** Water supply characteristics. All values in percentage [%].

| Survey Question                                     | Options              | Intervention         |                     | Control              |                     |
|-----------------------------------------------------|----------------------|----------------------|---------------------|----------------------|---------------------|
|                                                     |                      | Baseline<br>(n = 75) | Endline<br>(n = 72) | Baseline<br>(n = 45) | Endline<br>(n = 43) |
| What are the water sources used by the household? * | Private tap          | 17.5                 | 18                  | 2                    | 0                   |
|                                                     | Public tap           | 85.5                 | 82                  | 98                   | 97.5                |
|                                                     | Rainwater harvesting | 0                    | 1.5                 | 0                    | 0                   |
|                                                     | Protected source     | 30.5                 | 37.5                | 9                    | 14                  |
|                                                     | Open source          | 8                    | 1.5                 | 2                    | 4.5                 |

|                                                                         |                                    |      |      |      |      |
|-------------------------------------------------------------------------|------------------------------------|------|------|------|------|
| What is the main water source?                                          | Private tap                        | 17.3 | 18   | 2    | 0    |
|                                                                         | Public tap                         | 81.3 | 80.5 | 98   | 100  |
|                                                                         | Rainwater harvesting               | 0    | 0    | 0    | 0    |
|                                                                         | Protected source                   | 1.3  | 1.5  | 0    | 0    |
|                                                                         | Open source                        | 0    | 0    | 0    | 0    |
| Is the drinking water source functional?                                | Functioning well                   | 85.5 | 86   | 80   | 88.5 |
|                                                                         | Functioning not well               | 14.5 | 14   | 20   | 11.5 |
|                                                                         | Not functioning                    | 0    | 0    | 0    | 0    |
| Are you confident about repairs done within a week?                     | Very confident                     | 80   | 82   | 71   | 90.5 |
|                                                                         | Somewhat confident                 | 14.5 | 14   | 24.5 | 9.5  |
|                                                                         | Not confident at all               | 5.5  | 1.5  | 4.5  | 0    |
|                                                                         | Do not know/no answer              | 0    | 0    | 0    | 0    |
| Can you get help by the VMW?                                            | Yes                                | 86.5 | 95.8 | 100  | 100  |
|                                                                         | Maybe                              | 13.5 | 2.8  | 0    | 0    |
|                                                                         | No                                 | 0    | 0    | 0    | 0    |
|                                                                         | Do not know/no answer              | 0    | 1.4  | 0    | 0    |
| Do you know where to find spare parts for repairs?                      | Yes                                | 49.3 | 63.9 | 44.4 | 39.5 |
|                                                                         | Maybe                              | 6.7  | 5.6  | 4.4  | 4.7  |
|                                                                         | No                                 | 37.3 | 25   | 44.4 | 48.8 |
|                                                                         | Do not know/no answer              | 6.7  | 5.6  | 6.7  | 7    |
| In the past 6 months, was the water not available for more than a week? | Yes                                | 10.7 | 9.7  | 8.9  | 0    |
|                                                                         | No                                 | 89.3 | 87.5 | 88.9 | 100  |
|                                                                         | Don't know/no answer               | 0    | 2.8  | 2.2  | 0    |
| How is the reparation paid for?                                         | Water tariff                       | 89.3 | 84.7 | 91.1 | 100  |
|                                                                         | Users contribute money as needed   | 0    | 12.5 | 8.9  | 0    |
|                                                                         | Users contribute in kind regularly | 1.3  | 1.4  | 0    | 0    |
|                                                                         | In kind as needed                  | 0    | 0    | 0    | 0    |
|                                                                         | Someone else pays                  | 8    | 0    | 0    | 0    |
|                                                                         | No one pays                        | 2.7  | 1.4  | 0    | 0    |
|                                                                         | Don't know/no answer               |      |      |      |      |
| Do you think your water source will be functional in a year?            | Yes                                | 85.3 | 87.5 | 88.9 | 100  |
|                                                                         | No                                 | 8    | 0    | 6.7  | 0    |
|                                                                         | Don't know/no answer               | 6.7  | 12.5 | 4.4  | 0    |

\* Multiple answers possible.

**Table S9.** Water supply characteristics. All values in percentage [%] unless stated otherwise.

| Survey Question                                                         | Option                                         | Baseline<br>(n = 120) | Endline<br>(n = 115) |
|-------------------------------------------------------------------------|------------------------------------------------|-----------------------|----------------------|
| Involvement of any member of the household to the water project? *      | No                                             | 68                    | 66                   |
|                                                                         | Member of water users and sanitation committee | 0                     | 23                   |
|                                                                         | Member of WSP team                             | 8                     | 3                    |
|                                                                         | Village maintenance worker                     | 3                     | 2                    |
|                                                                         | Female community health volunteer              | 2                     | 3                    |
|                                                                         | Women tap stand care taker                     | 1                     | 10                   |
|                                                                         | Other                                          | 2                     | 4                    |
| How often does the water and sanitation users' committee meet together? | Monthly                                        | 76                    | 76                   |
|                                                                         | Bi-monthly                                     | 2                     | 1                    |
|                                                                         | Once every 3 months                            | 3                     | 2                    |
|                                                                         | Once every 6 months                            | 0                     | 0                    |
|                                                                         | Once per year                                  | 0                     | 0                    |
|                                                                         | As needed                                      | 7                     | 18                   |
|                                                                         | Never                                          | 3                     | 0                    |

|                                                                                   |                      |    |    |
|-----------------------------------------------------------------------------------|----------------------|----|----|
|                                                                                   | Do not know          | 9  | 3  |
|                                                                                   | Monthly <sup>1</sup> | 53 | 75 |
|                                                                                   | Bi-monthly           | 5  | 1  |
| How often does the water and sanitation users' committee meet with the community? | Once every 3 months  | 3  | 2  |
|                                                                                   | Once every 6 months  | 1  | 0  |
|                                                                                   | Once per year        | 8  | 2  |
|                                                                                   | As needed            | 17 | 17 |
|                                                                                   | Never                | 2  | 1  |
|                                                                                   | Do not know          | 11 | 3  |

\* Multiple answers possible; <sup>1</sup> During baseline, 60% of intervention and 40% control schemes respondents indicated monthly WUSC meetings with the community. At endline, the percentage increased with 79% and 67%, respectively.



**Table S10.** Additional survey questions asked within intervention schemes. All values in percentages [%] if not otherwise stated.

| Survey Question                                                                        | Options                          | Endline                       |
|----------------------------------------------------------------------------------------|----------------------------------|-------------------------------|
| Have you heard about the WSP in your community? ( <i>n</i> = 72)                       | Yes                              | 87.5                          |
|                                                                                        | No                               | 12.5                          |
| Did you participate to the WSP preparation? ( <i>n</i> = 63)                           | Yes                              | 54                            |
|                                                                                        | No                               | 46                            |
| What was your task? ( <i>n</i> = 34)                                                   | Member of the WSP task force     | 23.5                          |
|                                                                                        | Voluntary involved               | 76.5                          |
|                                                                                        | Other                            | 0                             |
| What activities were done after WSP preparation? ( <i>n</i> = 63)                      | Chlorination                     | 44.4                          |
|                                                                                        | Installation of intake filter    | 90.5                          |
|                                                                                        | Regular WUSC meetings            | 49.2                          |
|                                                                                        | Regular sanitary inspection      | 61.9                          |
|                                                                                        | Cleaning of structures           | 52.4                          |
|                                                                                        | Fixing broken parts              | 42.9                          |
| Do you know about the microbial water quality testing laboratory? ( <i>n</i> = 72)     | Yes                              | 93.1                          |
|                                                                                        | No                               | 6.9                           |
| Did you notice water quality testing at your household, tap, or tank? ( <i>n</i> = 72) | Yes, at the tap                  | 75                            |
|                                                                                        | Yes at the tank                  | 51.4                          |
|                                                                                        | Yes at the household             | 88.9                          |
|                                                                                        | No                               | 0                             |
| Did you receive the results from the tests? ( <i>n</i> = 72)                           | Yes                              | 70.8                          |
|                                                                                        | No                               | 29.2                          |
| From whom? ( <i>n</i> = 51)                                                            | Lab staff                        | 35.3                          |
|                                                                                        | Sampler                          | 21.6                          |
|                                                                                        | WUSC member                      | 62.7                          |
|                                                                                        | Visited the lab on my own        | 7.8                           |
|                                                                                        | NGO staffs                       | 72.5                          |
|                                                                                        | Other                            | 0                             |
| How was the result? ( <i>n</i> = 51)                                                   | Good                             | 62.7                          |
|                                                                                        | Bad                              | 37.3                          |
|                                                                                        | Don't know                       | 0                             |
| What activity did you start after learning about the bad quality? ( <i>n</i> = 19)     | Use other tap                    | 0                             |
|                                                                                        | Treatment of water               | 100                           |
|                                                                                        | Nothing                          | 0                             |
|                                                                                        | Other                            | 0                             |
| What treatment did you start? ( <i>n</i> = 19)                                         | Boiling                          | 15.8                          |
|                                                                                        | Ceramic candle filter            | 100                           |
|                                                                                        | Chlorination                     | 0                             |
|                                                                                        | Silver coated filter             | 0                             |
|                                                                                        | Screening/filtering with a cloth | 0                             |
|                                                                                        | UV/Sodis                         | 0                             |
|                                                                                        | Do not know                      | 0                             |
| Would you ask for water quality tests on your own? ( <i>n</i> = 72)                    | Yes                              | 95.8                          |
|                                                                                        | No                               | 4.2                           |
| How much would you pay? ( <i>n</i> = 69)                                               |                                  | 0–500 NPR<br>(M = 74,SD = 87) |
| Are you a member of the WUSC? ( <i>n</i> = 72)                                         | Yes                              | 12.5                          |
|                                                                                        | No                               | 87.5                          |
| Do you know about the results of monthly monitoring of WQ? ( <i>n</i> = 9)             | Yes                              | 100                           |
|                                                                                        | No                               | 0                             |
| Who have informed you about these results? * ( <i>n</i> = 9)                           | Lab staff                        | 44.4                          |
|                                                                                        | Water sampler                    | 44.4                          |
|                                                                                        | NGO staff                        | 88.9                          |

|                                          |                             |      |
|------------------------------------------|-----------------------------|------|
|                                          | Visited the lab on my own   | 11.1 |
|                                          | Other                       | 0    |
| What do you do with the results? (n = 9) | Discuss among the WUSC      | 88.9 |
|                                          | Inform the community        | 33.3 |
|                                          | Take action for improvement | 44.4 |
|                                          | Nothing                     | 0    |
|                                          | Other                       |      |

\* Multiple answers possible.

**Table S11.** Household samples characteristics. All values in percentage [%].

| Survey Question                                  | Options                            | Intervention         |                     | Control              |                     |
|--------------------------------------------------|------------------------------------|----------------------|---------------------|----------------------|---------------------|
|                                                  |                                    | Baseline<br>(n = 75) | Endline<br>(n = 72) | Baseline<br>(n = 45) | Endline<br>(n = 43) |
| How is the visual aspect of the sample you took? | Clear                              | 100                  | 97.2                | 95.6                 | 81.4                |
|                                                  | Debris present                     | 0                    | 2.8                 | 2.2                  | 9.3                 |
|                                                  | Somewhat turbid                    | 0                    | 0                   | 2.2                  | 9.3                 |
|                                                  | Very turbid                        | 0                    | 0                   | 0                    | 0                   |
| Did the sampled water receive a treatment?       | Yes, at system level               | 0                    | 0                   | 4.4                  | 0                   |
|                                                  | Yes, at household level            | 58.7                 | 25                  | 75.6                 | 86                  |
|                                                  | Yes, at system and household level | 2.7                  | 75                  | 2.2                  | 0                   |
|                                                  | No                                 | 37.3                 | 0                   | 17.8                 | 14                  |
|                                                  | Don't know                         | 1.3                  | 0                   | 0                    | 0                   |
| Where is the water sampled from? <sup>2</sup>    | Ceramic candle filter              | 57.3                 | 98.6                | 77.8                 | 81.4                |
|                                                  | Gagri                              | 22.7                 | 1.4                 | 17.8                 | 7                   |
|                                                  | Jerrycan                           | 4                    | 0                   | 0                    | 0                   |
|                                                  | Gallon                             | 14.7                 | 0                   | 4.4                  | 11.6                |
| Is the water chlorinated? <sup>1</sup>           | Yes                                | 0                    | 41.1                | 0                    | 0                   |
|                                                  | No                                 | 100                  | 58.9                | 100                  | 100                 |

<sup>1</sup> The two chlorinated scheme account for all the samples reported as chlorinated here. All of the samples of these two schemes are reported as chlorinated. No test was performed to measure chlorine levels; only the chlorination practice at the scheme level was reported. <sup>2</sup> This result is extracted from the field inspection forms and not from the household survey answers.

### Section S7. Comparison of Individual Sampling Points

Table S12 shows the percentage of samples at better or identical water quality at the endline as compared with the baseline. Each sampling point was compared before and after the intervention to compute this result.

**Table S12.** Percentage of samples with better or identical water quality at the endline as compared with the baseline.

| Location               | Intervention | Control |
|------------------------|--------------|---------|
| Household (n = 72; 43) | 83.3         | 53.5    |
| Tank (n = 11; 9)       | 45.5         | 55.6    |
| Tap (n = 14; 9)        | 92.9         | 66.7    |

There is a significant association at the household level between better or identical water quality at the endline compared with the baseline and whether or not the scheme received intervention ( $\chi^2(1) = 11.94, p = 0.001$ ). Based on the odds ratio, the odds of better or identical water quality at the household in an intervention scheme are 4.35 times higher than in a control scheme.

At the tanks and the taps, the Chi square test assumptions are violated. The likelihood ratio can be used in this case, but no significant associations are observed at any point (Tank: LR = 0.202,  $p = 0.653$ ; Tap: LR = 2.592,  $p = 0.107$ ).

### Section S8. Details of Chlorinated Schemes

Two drinking water schemes in the intervention area adopted chlorination activities at the scheme level as part of the upgrades of the system. Chlorination was done by pouring a bleach solution into the reservoir tanks of schemes 1 and 5 and waiting until the tanks filled and mixed thoroughly before distribution to taps. At scheme 1, the water quality was very good at the household and tap level ( $-0.3 \text{ Log}_{10} E. coli \text{ CFU}/100 \text{ mL}$  for both), which were water samples that likely had residual chlorinate. In this scheme, the water quality at the reservoir tank was worse ( $1.71 \text{ Log}_{10} \text{ CFU } E. coli/100 \text{ mL}$ ), because samples were drawn at the tank inlet (above the chlorinated supply). Additionally, household samples from scheme 1 had the lowest total coliform concentration with 78.6% of them being free from any coliform. Similarly, no coliforms were counted in the tap samples, while the tank samples had 300 total coliform CFU/100 mL.

During the endline, it rained during the day and night before the samples were collected in scheme 5, and chlorine was likely washed out due to the overflow of the tank. The water quality at the household level for this scheme was not as good ( $1.07 \text{ Log}_{10} \text{ CFU } E. coli/100 \text{ mL}$ ). At the tank and the tap, the mean contamination concentrations were 1.73 and 0.06  $\text{Log}_{10} \text{ CFU } E. coli/100 \text{ mL}$ , respectively. Again, chlorination only affects the quality at the taps or the households, as the water at the tank inlet is not yet chlorinated. The total coliform concentration at scheme 5 follows a similar trend as *E. coli* measurements. The tank samples had 300 CFU/100 mL total coliforms. The taps only had a few (0, 1, and 17 CFU/100 mL). Thus, the multibarrier approach with source protection, chlorination, and household treatment was not sufficient to provide safe drinking water in the case of scheme 5.

### Section S9. Comparison between Use and Non-Use of Ceramic Candle Filters

The use of filters increased throughout the study, and better water quality at the household level was observed from the baseline to endline period. Based on all the household stored water samples collected, simple linear regression indicated a mean difference in *E. coli* contamination of  $0.837 \text{ Log}_{10} \text{ CFU}/100 \text{ mL}$  between samples taken from a filter and from another type of container ( $\text{SE} = 0.147$ ,  $t = -5.689$ ,  $p < 0.001$ ,  $n = 258$ ). There was a significant correlation between better water quality and the use of household ceramic filters at the baseline ( $p = 0.014$ ), regular monitoring ( $p = 0.013$ ), and the endline ( $p = 0.001$ ).

Additionally, a Mann–Whitney U test indicated that the median *E. coli* contamination measured during the endline at the household level was significantly lower for samples from filters (Mdn = 1 CFU/100 mL) than from other types of containers (Mdn = 100 CFU/100 mL),  $U = 180.5$ ,  $p = 0.001$ ,  $r = -0.3$ . A similar result was observed at the baseline. The Supplementary Materials Tables S15 and S16 report the detailed water quality results at the baseline and endline for filter and non-filter samples.

### Section S10. Detailed Microbial Results

**Table S13.** Intervention schemes median *E. coli* contamination at the baseline and endline.

| Location                   | Baseline median<br>[CFU/100 mL] | Endline median<br>[CFU/100 mL] | Mann–Whitney U test<br>(asyp. sig. (2-tailed))                             |
|----------------------------|---------------------------------|--------------------------------|----------------------------------------------------------------------------|
| Household ( $n = 75; 72$ ) | 24                              | 0                              | $U = 1360$ , $p = 0.000$ , $z = -5.297$ , $r = -0.44$ , medium-size effect |
| Tank ( $n = 11; 15$ )      | 12                              | 4                              | $U = 64.5$ , $p = 0.347$                                                   |
| Tap ( $n = 14; 14$ )       | 10.5                            | 0.5                            | $U = 28.5$ , $p = 0.001$ , $z = -3.234$ , $r = 0.61$ , large-size effect   |

**Table S14.** Control schemes median *E. coli* contamination at baseline and endline.

| Location                   | Baseline median<br>[CFU/100 mL] | Endline median<br>[CFU/100 mL] | Mann–Whitney U test<br>(asyp. sig. (2-tailed)) |
|----------------------------|---------------------------------|--------------------------------|------------------------------------------------|
| Household ( $n = 45; 43$ ) | 8                               | 4                              | $U = 850.5$ , $p = 0.325$                      |
| Tank ( $n = 10; 10$ )      | 49.5                            | 8.5                            | $U = 32.5$ , $p = 0.185$                       |

|                    |    |   |                       |
|--------------------|----|---|-----------------------|
| Tap ( $n = 9; 9$ ) | 38 | 3 | $U = 21.5, p = 0.091$ |
|--------------------|----|---|-----------------------|

**Table S15.** Baseline ceramic filters water quality (*E. coli* contamination).

|                                                                                      | With Filter ( $n = 78$ ) | Without Filter ( $n = 42$ )   |
|--------------------------------------------------------------------------------------|--------------------------|-------------------------------|
| Mean <i>E. coli</i> concentration<br>[Log <sub>10</sub> CFU/100 mL] (SD),<br>[Range] | 1 (1),<br>[-0.3 to 2.48] | 1.46 (0.9),<br>[-0.3 to 2.48] |
| Median <sup>1</sup> <i>E. coli</i> concentration<br>[CFU/100 mL]                     | 12.5                     | 31.5                          |
| % at the WHO guidelines (0 CFU/100 mL)                                               | 23                       | 5                             |
| % at low risk (1–10 CFU/100 mL)                                                      | 25.5                     | 28.5                          |
| % at higher risk (11–TNTC CFU/100 mL)                                                | 51.5                     | 66.5                          |

<sup>1</sup> Mann–Whitney U (asympt. Sig. (2-tailed)):  $U = 1195, p = 0.014, z = -2.448, r = -0.22$ , small effect size

**Table S16.** Endline ceramic filters water quality (*E. coli* contamination).

| Statistic                                                                            | With Filter ( $n = 106$ )      | Without Filter ( $n = 9$ ) |
|--------------------------------------------------------------------------------------|--------------------------------|----------------------------|
| Mean <i>E. coli</i> concentration<br>[Log <sub>10</sub> CFU/100 mL] (SD),<br>[Range] | 0.44 (0.93),<br>[-0.3 to 2.48] | 1.5 (0.93),<br>[0–2.48]    |
| Median <sup>1</sup> <i>E. coli</i> concentration<br>[CFU/100 mL]                     | 1                              | 101                        |
| % at the WHO guidelines (0 CFU/100 mL)                                               | 45.3                           | 0                          |
| % at low risk (1–10 CFU/100 mL)                                                      | 25.5                           | 33.3                       |
| % at higher risk (11–TNTC CFU/100 mL)                                                | 29.2                           | 66.7                       |

<sup>1</sup> Mann–Whitney U (asympt. Sig. (2-tailed)):  $U = 180.5, p = 0.001, z = -3.212, r = -0.3$ , medium effect size

### Section S11. Temporal Representation of Baseline, Regular Monitoring, and Endline Data

Figures S1–S3 show a temporal representation of the median *E. coli* contamination at the baseline and endline periods, with the regular monitoring points in between for the households, tanks, and taps. A somewhat downward trend in the contamination level between the baseline and endline was observed at the household level. Nevertheless, major spikes were observed for some communities during the regular monitoring period (August–December). Among reservoir tanks, the trend was extremely variable with frequent large spikes, indicating a point of vulnerability in the overall system. Also, the tank water quality did not appear to align with what was observed at the household level, suggesting that household hygiene behavior played the important role in determining the water quality at the point of consumption and therefore overall health risk. At the taps, a general downward trend was observed, but (like tanks) spikes in the contamination were seen in certain months, indicating a system vulnerability and health hazard. Overall, regular monitoring indicated a trend of improved drinking water quality but without the guarantee of safety during all months.

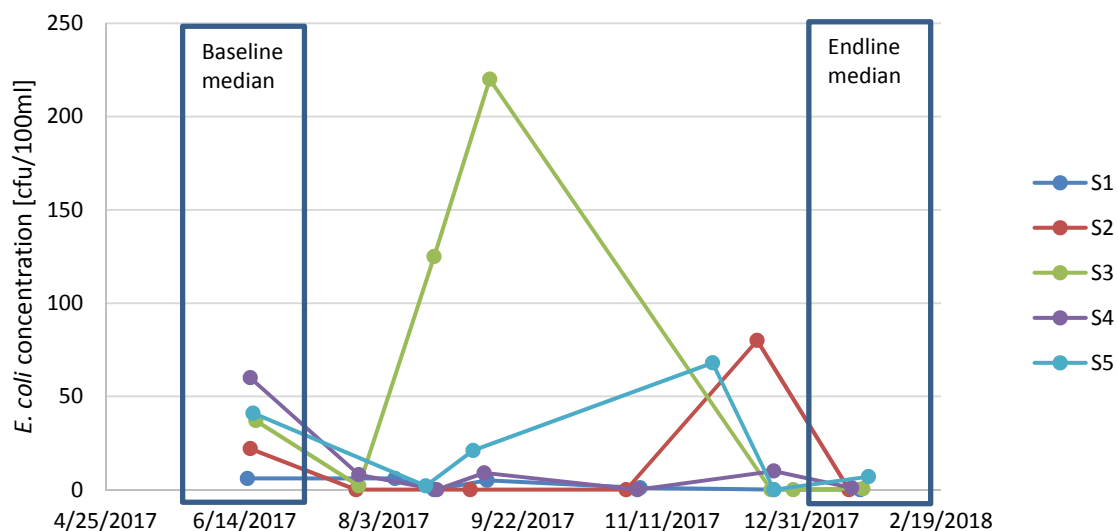

**Figure S1.** Baseline and endline median *E. coli* contamination and regular monitoring data for the household stored water containers within schemes S1–S5. During the regular monitoring period (August–December), only one household stored water container was sampled per scheme.

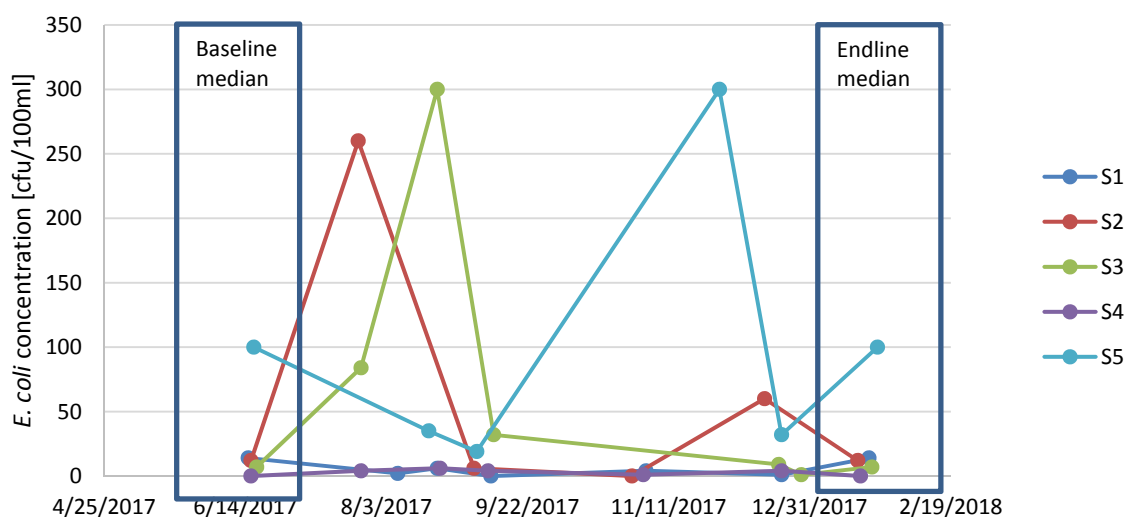

**Figure S2.** Baseline and endline median *E. coli* contamination and regular monitoring data for reservoir tanks within schemes S1–S5. During the regular monitoring period (August–December), only one tank was sampled per scheme.

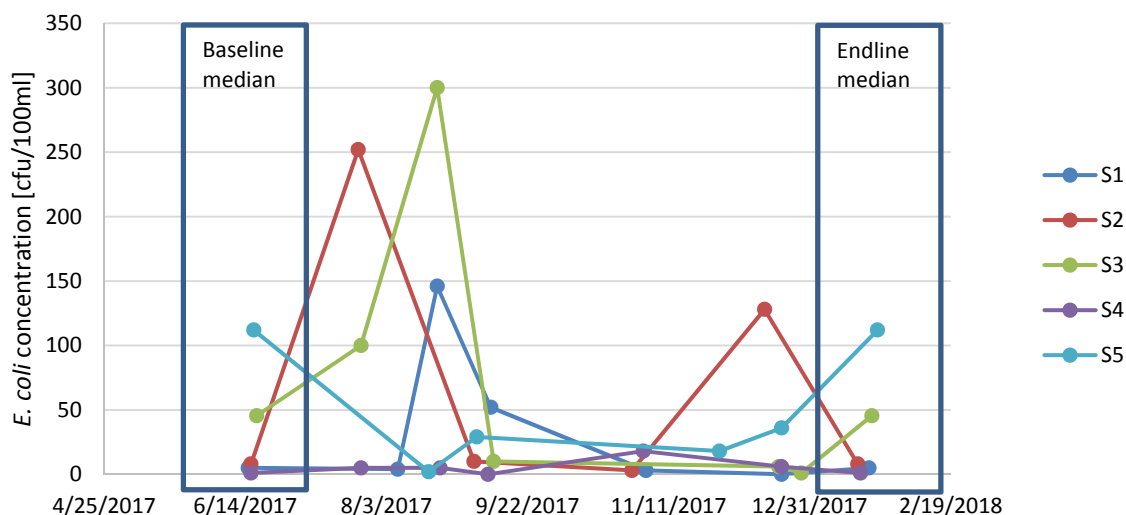

**Figure S3.** Baseline and endline median *E. coli* contamination and regular monitoring data for taps within schemes S1–S5. During the regular monitoring period (August–December), only one tap was sampled per scheme.

*Bivariate Comparisons (Median Approach)—Additional Information*

Figure S4 shows the median *E. coli* concentrations at each sampling point for the intervention and control schemes at the baseline and endline periods.

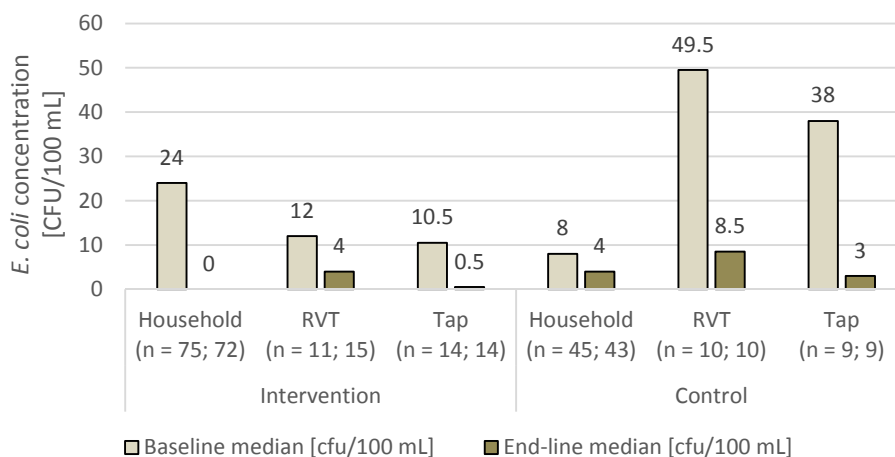

**Figure S4.** Median *E. coli* contamination at the baseline and endline periods for the intervention and control schemes at each sampling point.
